# Supplementary material for: Ceruloplasmin as a prognostic marker in patients with bile duct cancer
Source: PubMed Central journal article supplement (PMC5438709; doi:10.18632/oncotarget.15995), 2017-03-07
Supplement: oncotarget-08-29028-s001.pdf [file oncotarget-08-29028-s001.pdf]

## **Ceruloplasmin as a prognostic marker in patients with bile duct cancer**

### **SUPPLEMENTARY TABLES**

**Supplementary Table 1: Top 50 genes with positive coefficient toward advanced T stage.**

**See Supplementary File 1**

**Supplementary Table 2: Top 50 genes with positive coefficient toward advanced N stage.**

**See Supplementary File 2**

**Supplementary Table 3: Top 50 genes with positive coefficient toward perineural invasion.**

**See Supplementary File 3**
